# Supplementary material for: Plant roots affect free-living diazotroph communities in temperate grassland soils despite decades of fertilization
Source: PubMed Central journal article supplement (PMC11237082; doi:10.1038/s42003-024-06522-w), 2024-07-11
Supplement: 42003_2024_6522_MOESM2_ESM.pdf [file 42003_2024_6522_MOESM2_ESM.pdf]

## **SUPPLEMENTARY INFORMATION**

### **Plant roots affect free-living diazotroph communities in temperate grassland soils despite decades of fertilization**

**Supplementary Figure 1** Taxonomic composition of the diazotroph community in microenvironments associated with grasses and herbs across investigated fertilization treatments.

**Supplementary Figure 2** Species richness of diazotroph communities in microenvironments associated with grasses and herbs.

**Supplementary Figure 3** Diazotroph abundance in bulk soil and rhizosphere soil associated with four investigated plant species among different fertilization treatments.

**Supplementary Figure 4** Species richness of diazotroph communities and general microbial communities in bulk soils across different investigated fertilization treatments.

**Supplementary Figure 5** Diazotroph and general community composition in bulk soils among different years.

**Supplementary Table 1** Edaphic properties for investigate field treatments

**Supplementary Table 2** Effects of plant type and plant species on the diazotroph and general microbial community composition.

**Supplementary Table 3** Effects of pairwise comparisons of plant-associated compartments of individual grasses and herbs on the diazotroph and general microbial community.

**Supplementary Table 4** Effects of pairwise microenvironment comparisons of grasses and herbs on the diazotroph and general microbial community.

**Supplementary Table 5** Effects of pairwise comparisons of microenvironments between grasses and herbs on the diazotroph and general microbial community.

**Supplementary Table 6** Effect of fertilization and plant species on the diazotroph and general microbial community composition.

**Supplementary Table 7** Effect of fertilization and plant species on the diazotroph and general microbial community composition excluding sampled from the NPK treatment.

**Supplementary Table 8** Number of investigated samples.

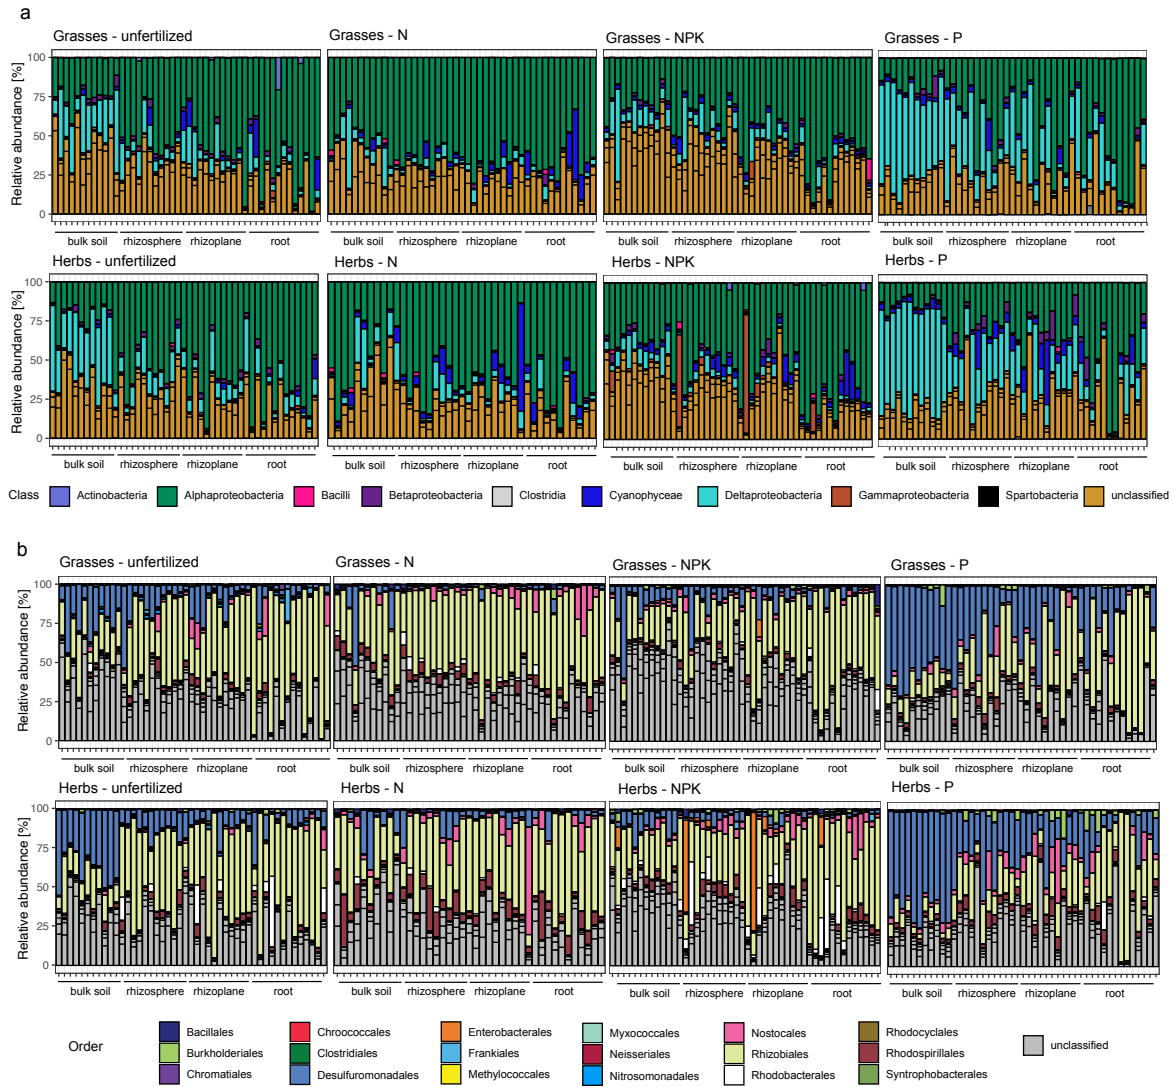

### Supplementary Figure 1

Taxonomic composition of the diazotroph community in microenvironments (bulk soil, rhizosphere, rhizoplane, root) associated with grasses and herbs across investigated fertilization treatments. Stacked bars reflect relative abundances [%] and are colored based on (a) class level and (b) order level.

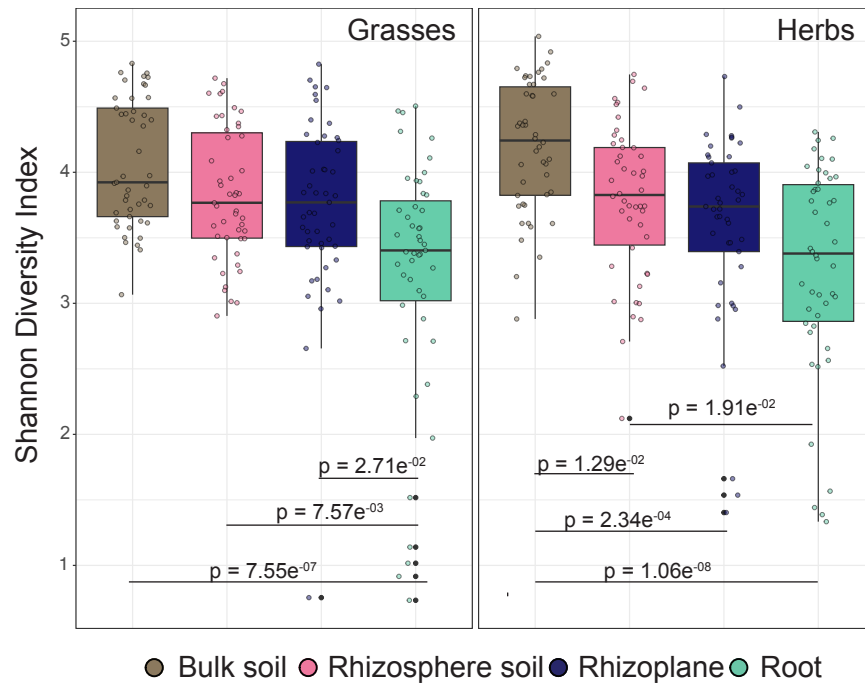

### Supplementary Figure 2

Species richness of diazotroph communities in bulk soil (brown), rhizosphere soil (pink), rhizoplane (blue) and root (turquoise) microenvironments associated with grasses and herbs based on Shannon diversity index. P-values indicate significant differences across microenvironments based on Kruskal Wallis - Dunn test. Lower and upper hinges represent the first and third quartiles.

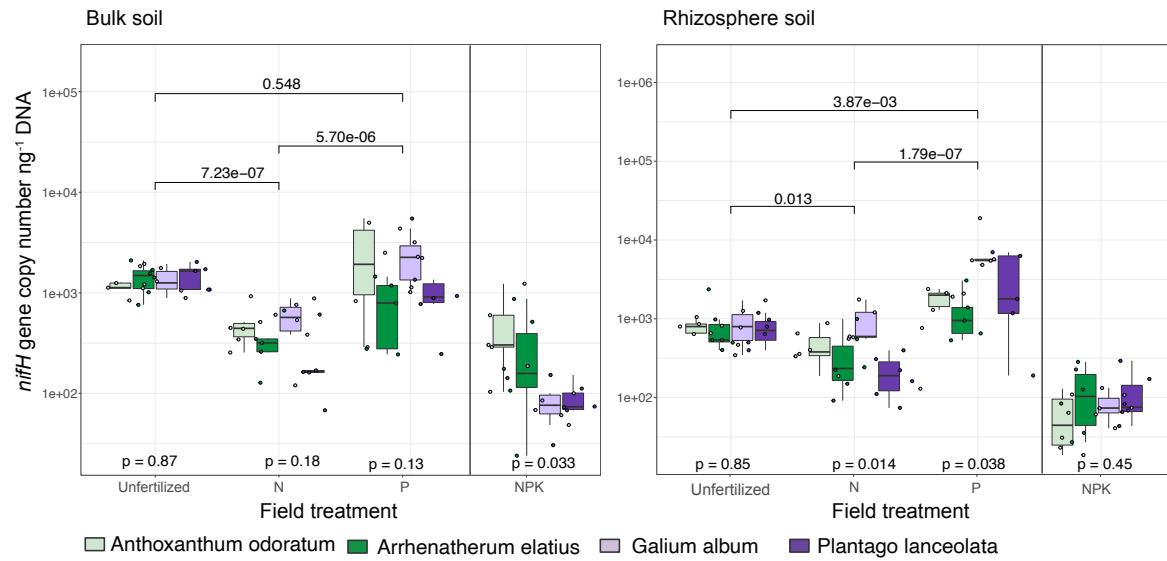

### Supplementary Figure 3

Diazotroph abundance in bulk soil and rhizosphere soil associated with four investigated plant species among different field treatments. Unfertilized, N and P field treatments were sampled in 2014, NPK treatment was sampled in 2018. P-values depict significant and non-significant differences among plant species (Mann-Whitney U test) and field treatments (Kruskal-Wallis, Dunn test; pooled data across all plant species were used per field treatment and p-values adjusted to Benjamini-Hochberg corrections for multiple testing are depicted). Lower and upper hinges represent the first and third quartiles.

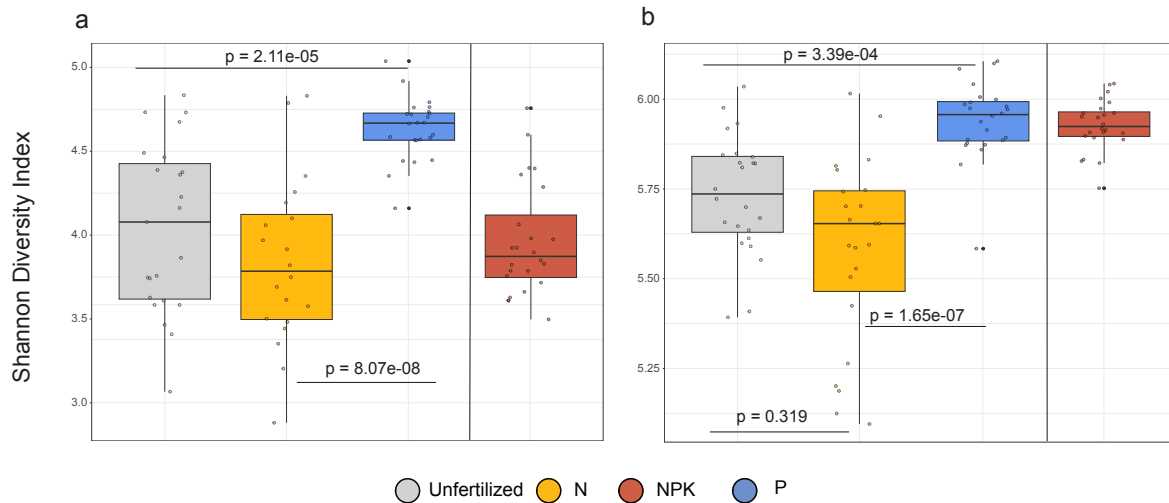

#### Supplementary Figure 4

Species richness of (a) diazotroph communities and (b) general microbial communities in bulk soils across different investigated field treatment (unfertilized – grey; N – yellow, NPK – red; P – blue) based on Shannon diversity index. Unfertilized, N and P field treatments were sampled in 2014, NPK treatment was sampled in 2018. P-values indicate significant differences across field treatments based on (a) ANOVA – TukeyHSD test and (b) Kruskal Wallis - Dunn test (p-values adjusted to to Benjamini-Hochberg corrections for multiple testing). Lower and upper hinges represent the first and third quartiles.

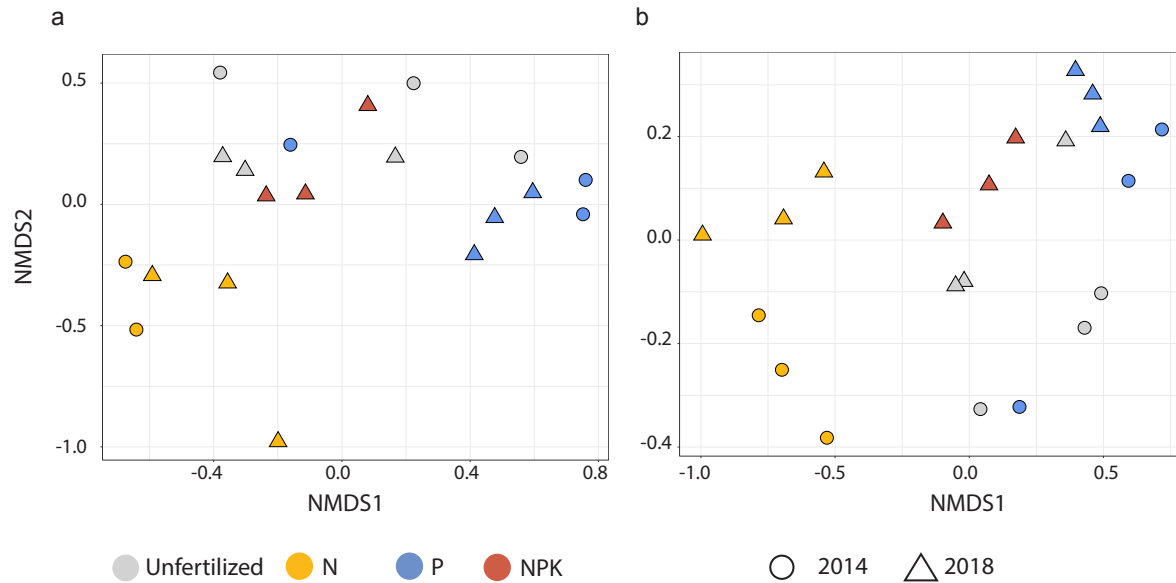

### Supplementary Figure 5

Community composition in bulk soils from 2014 and 2018. Non-metric multidimensional scaling (NMDS) ordination plots of (a) diazotroph (stress value = 8.50) and (b) general microbial (stress value = 5.17) communities based on Bray-Curtis metric, illustrating beta-diversity of bulk soil samples sampled from unfertilized (grey), N fertilized (yellow) and P fertilized (blue) plots among sampling years 2014 (circle) and 2018 (triangle). Soil from NPK fertilization (red) was only sampled in 2018.

Our study started with samples taken in 2014 of plots “unfertilized”, “N addition” and “P addition”. Based on these data, we wanted to include a fully fertilized plot – NPK. As such, the NPK data set was sampled in 2018. To avoid repeated major disturbances in the plots already sampled in 2014 (caused by taking out cores of ~20 cm diameter containing the roots system of grasses and herbs), it was not possible to re-sample all plants across all treatments in 2018. However, we were able to resample bulk soil to determine if there was any change in the microbial community over a 4-year time span.

We used these available bulk soil samples from 2014 and 2018 to investigate any changes in the community due to time. Our analysis demonstrates that the diazotroph and general microbial community composition in bulk soils did not significantly change in the diazotrophic (Fig. S5, panel a) nor general microbial community (Fig. S5, panel b) across the investigated time period (2014-2018). Specifically, no significant changes were detected in the diazotroph and general microbial community composition based on PERMANOVA analysis (below) in the N, P and unfertilized treatments across the investigated years.

For statistical analysis where we directly combined data from all treatments, we repeated the analysis excluding the NPK treatment to rule out that the observed effects stemmed from different sampling time points. The results indicated that the observed effects of fertilization treatments (N,P,unfertilized alone) were virtually identical to the observed effects when including the NPK treatment in the analysis (Supplementary Table 7).

(a) PERMANOVA results comparing the diazotroph community composition between years (p-values adjusted to Benjamini-Hochberg corrections for multiple testing are displayed). Additionally, the diazotroph community composition across fertilization treatments sampled in 2018 was compared.

N treatment (comparing 2014 & 2018) :  $R^2 = 0.236$ ,  $p = 0.4$ ;  
P treatment (comparing 2014 & 2018):  $R^2 = 0.223$ ,  $p = 0.3$ ;  
unfertilized treatment (comparing 2014, 2018):  $R^2 = 0.217$ ,  $p = 0.5$   
comparing all treatments (2018):  $R^2 = 0.54$ ,  $p = 7e-04$

(b) PERMANOVA results comparing the general microbial community composition among years (p-values adjusted to Benjamini-Hochberg corrections for multiple testing are displayed). Additionally, the general microbial community composition across fertilization treatments sampled in 2018 was compared.

N treatment (comparing 2014 & 2018) :  $R^2 = 0.259$ ,  $p = 0.2$ ;  
P treatment (comparing 2014 & 2018):  $R^2 = 0.233$ ,  $p = 0.1$ ;  
unfertilized treatment (comparing 2014 & 2018):  $R^2 = 0.249$ ,  $p = 0.2$   
comparing all treatments (2018):  $R^2 = 0.566$ ,  $p = 8e-04$

As such, the differences in sampling times did not significantly affect the observed results. Therefore, we felt confident to combine the data from 2014 and 2018 to explore the effect fertilization, plant species and microenvironments had in shaping the diazotrophic community in these grasslands.

### Supplementary Table 1

Edaphic properties of investigated field treatments including (a) soil parameters and (b) plant growth data.

a) Soil parameters for all investigated field treatments. Soil sampled in October 2011, 2016 and 2021 (approximately 4 months after N fertilization) was analyzed. Presented data include mean and standard error (SE) calculations across the three years (n=3).

| Soil parameters           | Field treatment |       |               |       |               |       |               |       |
|---------------------------|-----------------|-------|---------------|-------|---------------|-------|---------------|-------|
|                           | Unfertilized    |       | N             |       | P             |       | NPK           |       |
|                           | Mean<br>(n=3)   | SE    | Mean<br>(n=3) | SE    | Mean<br>(n=3) | SE    | Mean<br>(n=3) | SE    |
| pH                        | 5.46            | 0.07  | 4.41          | 0.10  | 6.00          | 0.06  | 5.43          | 0.10  |
| Total N [%]               | 0.39            | 0.02  | 0.48          | 0.06  | 0.36          | 0.01  | 0.37          | 0.02  |
| C organic [%]             | 4.83            | 0.56  | 5.16          | 0.66  | 4.26          | 0.28  | 4.11          | 0.51  |
| C:N                       | 12.18           | 0.97  | 10.81         | 0.63  | 11.97         | 0.40  | 11.12         | 0.77  |
| P [mg kg <sup>-1</sup> ]  | 20.67           | 1.20  | 24.33         | 2.85  | 119.67        | 4.91  | 27.67         | 0.88  |
| K [mg kg <sup>-1</sup> ]  | 79.00           | 12.50 | 71.67         | 13.92 | 68.67         | 11.22 | 154.67        | 23.70 |
| Fe [mg kg <sup>-1</sup> ] | 315.40          | 11.70 | 510.93        | 56.91 | 540.60        | 22.33 | 344.90        | 15.00 |

b) Plant growth data for all investigated field treatments. Data were obtained three times a year (end of May/early June, July, September) in 2011, 2016 and 2021. Presented data include mean and standard error (SE) calculations of three replicate plot and three timepoints across the three years (n=27).

| Plant yield                              | Field treatment |      |                |      |                |      |                |      |
|------------------------------------------|-----------------|------|----------------|------|----------------|------|----------------|------|
|                                          | Unfertilized    |      | N              |      | P              |      | NPK            |      |
|                                          | Mean<br>(n=27)  | SE   | Mean<br>(n=27) | SE   | Mean<br>(n=27) | SE   | Mean<br>(n=27) | SE   |
| Yield (Dry Weight, dt ha <sup>-1</sup> ) | 6.03            | 0.60 | 7.65           | 0.73 | 8.21           | 0.55 | 25.71          | 1.46 |
| Coverage [%]                             | 94.30           | 1.16 | 93.70          | 0.90 | 94.93          | 1.02 | 96.59          | 0.45 |
| Grasses [weight %]                       | 64.96           | 3.56 | 86.68          | 1.23 | 53.41          | 2.64 | 71.11          | 4.08 |
| Leguminoses [weight%]                    | 6.59            | 1.11 | 1.51           | 0.20 | 6.67           | 0.69 | 3.41           | 0.35 |
| Herbs [weight %]                         | 28.44           | 2.89 | 11.81          | 1.14 | 39.93          | 2.40 | 25.48          | 3.86 |



## Supplementary Table 2

Effects of group of plant species (plant type) and individual plant species on the diazotroph and general microbial community composition associated with rhizosphere, rhizoplane and root compartments in the four investigated fertilization treatments based on PERMANOVA on the Bray-Curtis dissimilarity index. Significant effects are shown in bold.

| Plant   | Plant-associated compartment  | Fertilization | Factors       | Diazotroph community |           |                |      |               | General microbial community |           |                |      |               |
|---------|-------------------------------|---------------|---------------|----------------------|-----------|----------------|------|---------------|-----------------------------|-----------|----------------|------|---------------|
|         |                               |               |               | Df                   | SumsOfSqs | R <sup>2</sup> | F    | p-value       | Df                          | SumsOfSqs | R <sup>2</sup> | F    | p-value       |
| all     | rhizosphere, rhizoplane, root | all           | Plant Type    | 1                    | 0.825     | 0.011          | 3.05 | <b>0.0007</b> | 1                           | 1.764     | 0.028          | 7.97 | <b>0.0001</b> |
|         |                               |               | Residuals     | 276                  | 75.712    | 0.989          |      |               | 276                         | 61.133    | 0.972          |      |               |
|         |                               |               | Total         | 277                  | 75.537    | 1.000          |      |               | 277                         | 62.898    | 1.000          |      |               |
|         |                               | unfertilized  | Plant Type    | 1                    | 0.541     | 0.032          | 2.28 | <b>0.0091</b> | 1                           | 0.683     | 0.050          | 3.67 | <b>0.0001</b> |
|         |                               |               | Residuals     | 70                   |           | 0.968          |      |               | 70                          | 13.011    | 0.950          |      |               |
|         |                               |               | Total         | 71                   | 17.157    | 1.000          |      |               | 71                          | 13.694    | 1.000          |      |               |
|         |                               | N             | Plant Type    | 1                    | 0.705     | 0.054          | 3.67 | <b>0.0001</b> | 1                           | 1.188     | 0.083          | 5.63 | <b>0.0001</b> |
|         |                               |               | Residuals     | 64                   | 12.294    | 0.946          |      |               | 62                          | 13.084    | 0.917          |      |               |
|         |                               |               | Total         | 65                   | 12.999    | 1.000          |      |               | 63                          | 14.272    | 1.000          |      |               |
|         |                               | NPK           | Plant Type    | 1                    | 0.524     | 0.034          | 2.43 | <b>0.0115</b> | 1                           | 0.562     | 0.043          | 3.12 | <b>0.0003</b> |
|         |                               |               | Residuals     | 70                   | 15.122    | 0.967          |      |               | 70                          | 12.613    | 0.957          |      |               |
|         |                               |               | Total         | 71                   | 15.646    | 1.000          |      |               | 71                          | 13.175    | 1.000          |      |               |
|         |                               | P             | Plant Type    | 1                    | 0.593     | 0.043          | 2.93 | <b>0.0006</b> | 1                           | 0.830     | 0.061          | 4.44 | <b>0.0001</b> |
|         |                               |               | Residuals     | 66                   | 13.353    | 0.957          |      |               | 68                          | 12.720    | 0.939          |      |               |
|         |                               |               | Total         | 67                   | 13.945    | 1.000          |      |               | 69                          | 13.550    | 1.000          |      |               |
| grasses | rhizosphere, rhizoplane, root | all           | Plant Species | 1                    | 0.566     | 0.015          | 2.06 | <b>0.0158</b> | 1                           | 0.699     | 0.026          | 3.77 | <b>0.0002</b> |
|         |                               |               | Residuals     | 139                  | 38.311    | 0.985          |      |               | 140                         | 25.997    | 0.974          |      |               |
|         |                               |               | Total         | 140                  | 38.877    | 1.000          |      |               | 141                         | 26.697    | 1.000          |      |               |
|         |                               | unfertilized  | Plant Species | 1                    | 0.328     | 0.037          | 1.31 | 0.1909        | 1                           | 0.386     | 0.070          | 2.55 | <b>0.0086</b> |
|         |                               |               | Residuals     | 34                   | 8.504     | 0.963          |      |               | 34                          | 5.136     | 0.930          |      |               |
|         |                               |               | Total         | 35                   | 8.832     | 1.000          |      |               | 35                          | 5.522     | 1.000          |      |               |
|         |                               | N             | Plant Species | 1                    | 0.331     | 0.049          | 1.75 | <b>0.0473</b> | 1                           | 0.445     | 0.067          | 2.43 | <b>0.0114</b> |
|         |                               |               | Residuals     | 34                   | 6.441     | 0.951          |      |               | 34                          | 6.212     | 0.933          |      |               |
|         |                               |               | Total         | 35                   | 6.772     | 1.000          |      |               | 35                          | 6.657     | 1.000          |      |               |
|         |                               | NPK           | Plant Species | 1                    | 0.414     | 0.058          | 2.09 | <b>0.0321</b> | 1                           | 0.190     | 0.049          | 1.75 | 0.0667        |
|         |                               |               | Residuals     | 34                   | 6.739     | 0.942          |      |               | 34                          | 3.704     | 0.951          |      |               |
|         |                               |               | Total         | 35                   | 7.153     | 1.000          |      |               | 35                          | 3.895     | 1.000          |      |               |
|         |                               | P             | Plant Species | 1                    | 0.345     | 0.050          | 1.64 | 0.0662        | 1                           | 0.405     | 0.076          | 2.65 | <b>0.0046</b> |
|         |                               |               | Residuals     | 31                   | 6.536     | 0.950          |      |               | 32                          | 4.900     | 0.924          |      |               |
|         |                               |               | Total         | 32                   | 6.882     | 1.000          |      |               | 33                          | 5.305     | 1.000          |      |               |
| herbs   | rhizosphere, rhizoplane, root | all           | Plant Species | 1                    | 0.587     | 0.016          | 2.25 | <b>0.0106</b> | 1                           | 0.820     | 0.029          | 4.20 | <b>0.0001</b> |
|         |                               |               | Residuals     | 135                  | 35.248    | 0.984          |      |               | 139                         | 27.127    | 0.971          |      |               |
|         |                               |               | Total         | 136                  | 35.835    | 1.000          |      |               | 140                         | 27.947    | 1.000          |      |               |
|         |                               | unfertilized  | Plant Species | 1                    | 0.451     | 0.058          | 2.09 | <b>0.028</b>  | 1                           | 0.360     | 0.072          | 2.63 | <b>0.0022</b> |
|         |                               |               | Residuals     | 34                   | 7.333     | 0.942          |      |               | 34                          | 4.651     | 0.928          |      |               |
|         |                               |               | Total         | 35                   | 7.783     | 1.000          |      |               | 35                          | 5.010     | 1.000          |      |               |
|         |                               | N             | Plant Species | 1                    | 0.447     | 0.081          | 2.47 | <b>0.0082</b> | 1                           | 0.591     | 0.099          | 3.40 | <b>0.001</b>  |
|         |                               |               | Residuals     | 28                   | 5.075     | 0.919          |      |               | 31                          | 5.388     | 0.901          |      |               |
|         |                               |               | Total         | 29                   | 5.522     | 1.000          |      |               | 32                          | 5.979     | 1.000          |      |               |
|         |                               | NPK           | Plant Species | 1                    | 0.723     | 0.091          | 3.39 | <b>0.0008</b> | 1                           | 0.392     | 0.082          | 3.02 | <b>0.0052</b> |
|         |                               |               | Residuals     | 34                   | 7.246     | 0.909          |      |               | 34                          | 4.410     | 0.918          |      |               |
|         |                               |               | Total         | 35                   | 7.969     | 1.000          |      |               | 35                          | 4.801     | 1.000          |      |               |
|         |                               | P             | Plant Species | 1                    | 0.320     | 0.049          | 1.71 | 0.0539        | 1                           | 0.259     | 0.066          | 2.39 | <b>0.0053</b> |
|         |                               |               | Residuals     | 33                   | 6.152     | 0.951          |      |               | 34                          | 3.674     | 0.934          |      |               |
|         |                               |               | Total         | 34                   | 6.471     | 1.000          |      |               | 35                          | 3.933     | 1.000          |      |               |

### Supplementary Table 3

Effects of plant-associated compartments (rs=rhizosphere, rp=rhizoplane) of individual grasses (Anth. = *Anthoxanthum odoratum*, Arrhen. = *Arrhenatherum elatius*) and herbs (Gal. = *Galium album*, Plant. = *Plantago lanceolata*) on the diazotroph and general microbial community based on pairwise comparisons using the Bray-Curtis dissimilarity index. Significant effects are shown in bold based on an adjusted p-value due to multiple comparisons using the Benjamini-Hochberg procedure (BH).

| Plants  | Fertilization | Pairs                         | Diazotroph community |           |       |                |         |             |    | General microbial community |       |                |         |               |  |
|---------|---------------|-------------------------------|----------------------|-----------|-------|----------------|---------|-------------|----|-----------------------------|-------|----------------|---------|---------------|--|
|         |               |                               | Df                   | SumsOfSqs | F     | R <sup>2</sup> | p-value | p-adj. (BH) | Df | SumsOfSqs                   | F     | R <sup>2</sup> | p-value | p-adj. (BH)   |  |
| grasses | unfertilized  | Anth. - rs vs Arrhen.- rs     | 1                    | 0.128     | 0.702 | 0.066          | 0.729   | 0.8727      | 1  | 0.145                       | 0.997 | 0.091          | 0.378   | 0.4550        |  |
|         |               | Arrhen.- rp vs Anth. - rp     | 1                    | 0.212     | 0.914 | 0.084          | 0.479   | 0.7987      | 1  | 0.182                       | 1.314 | 0.116          | 0.186   | 0.2536        |  |
|         |               | Arrhen.- root vs Anth. - root | 1                    | 0.177     | 0.547 | 0.052          | 0.949   | 0.9494      | 1  | 0.192                       | 1.474 | 0.128          | 0.083   | 0.1250        |  |
|         | N             | Arrhen.- rs vs Anth. - rs     | 1                    | 0.197     | 1.281 | 0.114          | 0.204   | 0.3543      | 1  | 0.179                       | 0.981 | 0.089          | 0.401   | 0.5010        |  |
|         |               | Arrhen.- rp vs Anth. - rp     | 1                    | 0.163     | 0.985 | 0.090          | 0.474   | 0.6466      | 1  | 0.166                       | 0.904 | 0.083          | 0.498   | 0.5746        |  |
|         |               | Arrhen.- root vs Anth. - root | 1                    | 0.169     | 0.768 | 0.071          | 0.795   | 0.8521      | 1  | 0.308                       | 2.580 | 0.205          | 0.005   | <b>0.0084</b> |  |
|         | NPK           | Arrhen.- rs vs Anth. - rs     | 1                    | 0.141     | 0.898 | 0.082          | 0.415   | 0.5183      | 1  | 0.086                       | 1.004 | 0.091          | 0.409   | 0.4606        |  |
|         |               | Arrhen.- rp vs Anth. - rp     | 1                    | 0.137     | 0.750 | 0.070          | 0.668   | 0.7669      | 1  | 0.082                       | 0.956 | 0.087          | 0.430   | 0.4606        |  |
|         |               | Arrhen.- root vs Anth. - root | 1                    | 0.280     | 1.266 | 0.112          | 0.215   | 0.3462      | 1  | 0.114                       | 1.072 | 0.097          | 0.327   | 0.4455        |  |
|         | P             | Arrhen.- rs vs Anth. - rs     | 1                    | 0.130     | 0.767 | 0.079          | 0.741   | 0.8552      | 1  | 0.177                       | 1.381 | 0.133          | 0.164   | 0.2239        |  |
|         |               | Anth. - rp vs Arrhen.- rp     | 1                    | 0.242     | 1.139 | 0.112          | 0.355   | 0.6223      | 1  | 0.254                       | 2.248 | 0.200          | 0.030   | 0.0500        |  |
|         |               | Anth. - root vs Arrhen.- root | 1                    | 0.340     | 1.376 | 0.133          | 0.161   | 0.4836      | 1  | 0.188                       | 1.158 | 0.104          | 0.283   | 0.3136        |  |
| herbs   | unfertilized  | Gal.- rs vs Plant.- rs        | 1                    | 0.117     | 0.663 | 0.062          | 0.753   | 0.8708      | 1  | 0.073                       | 0.606 | 0.057          | 0.868   | 0.8677        |  |
|         |               | Gal.- rp vs Plant.- rp        | 1                    | 0.186     | 0.843 | 0.078          | 0.561   | 0.8408      | 1  | 0.136                       | 1.322 | 0.117          | 0.190   | 0.2588        |  |
|         |               | Plant.- root vs Gal.- root    | 1                    | 0.282     | 1.059 | 0.096          | 0.370   | 0.7901      | 1  | 0.500                       | 3.676 | 0.269          | 0.002   | <b>0.0060</b> |  |
|         | N             | Gal.- rs vs Plant.- rs        | 1                    | 0.241     | 1.446 | 0.153          | 0.112   | 0.5261      | 1  | 0.192                       | 1.202 | 0.118          | 0.230   | 0.2654        |  |
|         |               | Gal.- rp vs Plant.- rp        | 1                    | 0.284     | 1.398 | 0.166          | 0.088   | 0.5261      | 1  | 0.257                       | 1.560 | 0.148          | 0.109   | 0.1488        |  |
|         |               | Gal.- root vs Plant.- root    | 1                    | 0.119     | 0.586 | 0.061          | 0.897   | 0.9434      | 1  | 0.571                       | 3.972 | 0.306          | 0.003   | <b>0.0140</b> |  |
|         | NPK           | Gal.- rs vs Plant.- rs        | 1                    | 0.224     | 1.275 | 0.113          | 0.227   | 0.3782      | 1  | 0.153                       | 2.089 | 0.173          | 0.035   | <b>0.0406</b> |  |
|         |               | Gal.- rp vs Plant.- rp        | 1                    | 0.245     | 1.004 | 0.091          | 0.447   | 0.6091      | 1  | 0.138                       | 1.550 | 0.134          | 0.089   | 0.0949        |  |
|         |               | Gal.- root vs Plant.- root    | 1                    | 0.428     | 1.840 | 0.155          | 0.057   | 0.2126      | 1  | 0.552                       | 5.408 | 0.351          | 0.002   | <b>0.0047</b> |  |
|         | P             | Gal.- rs vs Plant.- rs        | 1                    | 0.101     | 0.686 | 0.064          | 0.884   | 0.9366      | 1  | 0.068                       | 0.900 | 0.083          | 0.543   | 0.5425        |  |
|         |               | Gal.- rp vs Plant.- rp        | 1                    | 0.149     | 0.810 | 0.075          | 0.676   | 0.9217      | 1  | 0.096                       | 1.223 | 0.109          | 0.121   | 0.1393        |  |
|         |               | Gal.- root vs Plant.- root    | 1                    | 0.229     | 1.003 | 0.100          | 0.422   | 0.9217      | 1  | 0.463                       | 5.263 | 0.345          | 0.003   | <b>0.0047</b> |  |

### Supplementary Table 4

Effects of microenvironment (bs=bulk soil, rs=rhizosphere, rp=rhizoplane) of grasses and herbs on the diazotroph and the general microbial community based on pairwise comparisons using the Bray-Curtis dissimilarity index. Significant effects are shown in bold based on an adjusted p-value due to multiple comparisons using the Benjamini-Hochberg procedure (BH).

| Plants     | Fertilization | Pairs      | Diazotroph community |           |       |                |               |               | General microbial community |           |       |                |               |               |
|------------|---------------|------------|----------------------|-----------|-------|----------------|---------------|---------------|-----------------------------|-----------|-------|----------------|---------------|---------------|
|            |               |            | Df                   | SumsOfSqs | F     | R <sup>2</sup> | p-value       | p-adj. (BH)   | Df                          | SumsOfSqs | F     | R <sup>2</sup> | p-value       | p-adj. (BH)   |
| grasses    | unfertilized  | bs vs rs   | 1                    | 0.776     | 4.397 | 0.167          | 0.0002        | <b>0.0004</b> | 1                           | 0.776     | 4.397 | 0.167          | 0.0002        | <b>0.0004</b> |
|            |               | bs vs rp   | 1                    | 0.871     | 4.294 | 0.163          | 0.0001        | <b>0.0003</b> | 1                           | 0.871     | 4.294 | 0.163          | 0.0002        | <b>0.0004</b> |
|            |               | bs vs root | 1                    | 1.485     | 6.114 | 0.217          | 0.0001        | <b>0.0003</b> | 1                           | 1.485     | 6.114 | 0.217          | 0.0001        | <b>0.0004</b> |
|            |               | rs vs root | 1                    | 0.810     | 3.325 | 0.131          | 0.0008        | <b>0.0012</b> | 1                           | 0.810     | 3.325 | 0.131          | 0.0012        | <b>0.0018</b> |
|            |               | rs vs rp   | 1                    | 0.196     | 0.962 | 0.042          | 0.4492        | 0.4492        | 1                           | 0.196     | 0.962 | 0.042          | 0.4374        | 0.4374        |
|            |               | root vs rp | 1                    | 0.403     | 1.492 | 0.063          | 0.1241        | 0.1489        | 1                           | 0.403     | 1.492 | 0.063          | 0.1224        | 0.1469        |
|            | N             | bs vs rs   | 1                    | 0.337     | 1.944 | 0.093          | 0.0365        | <b>0.0438</b> | 1                           | 0.337     | 1.944 | 0.093          | 0.0362        | <b>0.0434</b> |
|            |               | bs vs rp   | 1                    | 0.518     | 2.911 | 0.133          | 0.0004        | <b>0.0008</b> | 1                           | 0.518     | 2.911 | 0.133          | 0.0002        | <b>0.0004</b> |
|            |               | bs vs root | 1                    | 0.960     | 4.645 | 0.196          | 0.0001        | <b>0.0006</b> | 1                           | 0.960     | 4.645 | 0.196          | 0.0001        | <b>0.0003</b> |
|            |               | rs vs root | 1                    | 0.758     | 4.064 | 0.156          | 0.0002        | <b>0.0006</b> | 1                           | 0.758     | 4.064 | 0.156          | 0.0001        | <b>0.0003</b> |
|            |               | rs vs rp   | 1                    | 0.168     | 1.041 | 0.045          | 0.3964        | 0.3964        | 1                           | 0.168     | 1.041 | 0.045          | 0.3912        | 0.3912        |
|            |               | root vs rp | 1                    | 0.342     | 1.797 | 0.076          | 0.0323        | <b>0.0438</b> | 1                           | 0.342     | 1.797 | 0.076          | 0.0325        | <b>0.0434</b> |
|            | NPK           | bs vs rs   | 1                    | 0.224     | 1.389 | 0.059          | 0.1766        | 0.2119        | 1                           | 0.224     | 1.389 | 0.059          | 0.1812        | 0.2174        |
|            |               | bs vs rp   | 1                    | 0.381     | 2.201 | 0.091          | 0.0463        | 0.0695        | 1                           | 0.381     | 2.201 | 0.091          | 0.0429        | 0.0644        |
|            |               | bs vs root | 1                    | 1.036     | 5.256 | 0.193          | 0.0001        | <b>0.0006</b> | 1                           | 1.036     | 5.256 | 0.193          | 0.0002        | <b>0.0006</b> |
|            |               | rs vs root | 1                    | 0.847     | 4.433 | 0.168          | 0.0002        | <b>0.0006</b> | 1                           | 0.847     | 4.433 | 0.168          | 0.0001        | <b>0.0006</b> |
|            |               | rs vs rp   | 1                    | 0.165     | 0.985 | 0.043          | 0.3977        | 0.3977        | 1                           | 0.165     | 0.985 | 0.043          | 0.4001        | 0.4001        |
|            |               | root vs rp | 1                    | 0.462     | 2.279 | 0.094          | 0.0201        | <b>0.0402</b> | 1                           | 0.462     | 2.279 | 0.094          | 0.02          | <b>0.0400</b> |
|            | P             | bs vs rs   | 1                    | 0.389     | 2.665 | 0.113          | 0.0008        | <b>0.0016</b> | 1                           | 0.389     | 2.665 | 0.113          | 0.0007        | <b>0.0016</b> |
|            |               | bs vs rp   | 1                    | 0.550     | 3.240 | 0.134          | 0.0004        | <b>0.0012</b> | 1                           | 0.550     | 3.240 | 0.134          | 0.0008        | <b>0.0016</b> |
| bs vs root |               | 1          | 1.105                | 5.827     | 0.217 | 0.0001         | <b>0.0006</b> | 1             | 1.105                       | 5.827     | 0.217 | 0.0001         | <b>0.0006</b> |               |
| rs vs root |               | 1          | 0.392                | 1.859     | 0.085 | 0.0317         | <b>0.0476</b> | 1             | 0.392                       | 1.859     | 0.085 | 0.0285         | <b>0.0428</b> |               |
| rs vs rp   |               | 1          | 0.120                | 0.629     | 0.030 | 0.8284         | 0.8284        | 1             | 0.120                       | 0.629     | 0.030 | 0.8295         | 0.8295        |               |
| root vs rp |               | 1          | 0.254                | 1.075     | 0.051 | 0.3518         | 0.4222        | 1             | 0.254                       | 1.075     | 0.051 | 0.3566         | 0.4279        |               |
| herbs      | unfertilized  | bs vs rs   | 1                    | 0.792     | 4.784 | 0.186          | 0.0003        | <b>0.0006</b> | 1                           | 0.401     | 3.097 | 0.123          | 0.0001        | <b>0.0001</b> |
|            |               | bs vs rp   | 1                    | 0.963     | 5.069 | 0.194          | 0.0001        | <b>0.0003</b> | 1                           | 0.510     | 3.832 | 0.148          | 0.0001        | <b>0.0001</b> |
|            |               | bs vs root | 1                    | 1.303     | 6.020 | 0.223          | 0.0001        | <b>0.0003</b> | 1                           | 0.971     | 6.467 | 0.227          | 0.0001        | <b>0.0001</b> |
|            |               | rs vs root | 1                    | 0.478     | 2.178 | 0.090          | 0.0174        | <b>0.0261</b> | 1                           | 0.576     | 3.805 | 0.147          | 0.0001        | <b>0.0001</b> |
|            |               | rs vs rp   | 1                    | 0.172     | 0.888 | 0.039          | 0.5084        | 0.6101        | 1                           | 0.108     | 0.800 | 0.035          | 0.8054        | 0.8054        |
|            |               | root vs rp | 1                    | 0.199     | 0.818 | 0.036          | 0.6254        | 0.6254        | 1                           | 0.499     | 3.220 | 0.128          | 0.0001        | <b>0.0001</b> |
|            | N             | bs vs rs   | 1                    | 0.318     | 1.618 | 0.078          | 0.0788        | 0.1730        | 1                           | 0.577     | 3.467 | 0.169          | 0.0006        | <b>0.0012</b> |
|            |               | bs vs rp   | 1                    | 0.319     | 1.486 | 0.076          | 0.0865        | 0.1730        | 1                           | 0.562     | 2.997 | 0.136          | 0.0022        | <b>0.0033</b> |
|            |               | bs vs root | 1                    | 0.613     | 2.988 | 0.130          | 0.0018        | <b>0.0108</b> | 1                           | 1.020     | 5.310 | 0.218          | 0.0001        | <b>0.0006</b> |
|            |               | rs vs root | 1                    | 0.207     | 1.117 | 0.056          | 0.3224        | 0.4836        | 1                           | 0.525     | 2.992 | 0.158          | 0.0004        | <b>0.0012</b> |
|            |               | rs vs rp   | 1                    | 0.095     | 0.493 | 0.028          | 0.9764        | 0.9764        | 1                           | 0.177     | 1.042 | 0.061          | 0.3321        | 0.3321        |
|            |               | root vs rp | 1                    | 0.137     | 0.674 | 0.036          | 0.8067        | 0.9680        | 1                           | 0.453     | 2.304 | 0.113          | 0.004         | <b>0.0048</b> |
|            | NPK           | bs vs rs   | 1                    | 0.273     | 1.698 | 0.072          | 0.0959        | 0.1439        | 1                           | 0.278     | 2.175 | 0.090          | 0.0009        | <b>0.0011</b> |
|            |               | bs vs rp   | 1                    | 0.531     | 2.752 | 0.111          | 0.0059        | <b>0.0177</b> | 1                           | 0.430     | 3.034 | 0.121          | 0.0001        | <b>0.0002</b> |
|            |               | bs vs root | 1                    | 1.049     | 5.341 | 0.195          | 0.0001        | <b>0.0006</b> | 1                           | 1.348     | 8.497 | 0.279          | 0.0001        | <b>0.0002</b> |
|            |               | rs vs root | 1                    | 0.467     | 2.169 | 0.090          | 0.0261        | 0.0522        | 1                           | 1.117     | 7.082 | 0.244          | 0.0001        | <b>0.0002</b> |
|            |               | rs vs rp   | 1                    | 0.149     | 0.703 | 0.031          | 0.7256        | 0.7256        | 1                           | 0.184     | 1.303 | 0.056          | 0.0836        | 0.0836        |
|            |               | root vs rp | 1                    | 0.214     | 0.866 | 0.038          | 0.558         | 0.6696        | 1                           | 0.841     | 4.898 | 0.182          | 0.0001        | <b>0.0002</b> |
|            | P             | bs vs rs   | 1                    | 0.639     | 5.248 | 0.193          | 0.0002        | <b>0.0004</b> | 1                           | 0.429     | 3.576 | 0.140          | 0.0001        | <b>0.0001</b> |
|            |               | bs vs rp   | 1                    | 1.018     | 7.231 | 0.247          | 0.0001        | <b>0.0003</b> | 1                           | 0.625     | 4.931 | 0.183          | 0.0001        | <b>0.0001</b> |
| bs vs root |               | 1          | 1.523                | 9.419     | 0.310 | 0.0001         | <b>0.0003</b> | 1             | 1.372                       | 9.413     | 0.300 | 0.0001         | <b>0.0001</b> |               |
| rs vs root |               | 1          | 0.484                | 2.635     | 0.111 | 0.0061         | <b>0.0092</b> | 1             | 0.841                       | 5.403     | 0.197 | 0.0001         | <b>0.0001</b> |               |
| rs vs rp   |               | 1          | 0.138                | 0.855     | 0.037 | 0.6467         | 0.6467        | 1             | 0.169                       | 1.233     | 0.053 | 0.0672         | 0.0672        |               |
| root vs rp |               | 1          | 0.319                | 1.567     | 0.069 | 0.0946         | 0.1135        | 1             | 0.704                       | 4.335     | 0.165 | 0.0001         | <b>0.0001</b> |               |

### Supplementary Table 5

Effects of microenvironments between grasses and herbs (bs=bulk soil, rs=rhizosphere, rp=rhizoplane) on the diazotroph and the general microbial community using pairwise comparisons based on the Bray-Curtis dissimilarity index. Significant effects are shown in bold based on an adjusted p-value due to multiple comparisons using the Benjamini-Hochberg procedure (BH).

| Plants | Fertilization | Pairs                   | Diazotroph community |           |       |                |         |               | General microbial community |           |       |                |         |               |
|--------|---------------|-------------------------|----------------------|-----------|-------|----------------|---------|---------------|-----------------------------|-----------|-------|----------------|---------|---------------|
|        |               |                         | Df                   | SumsOfSqs | F     | R <sup>2</sup> | p-value | p-adj. (BH)   | Df                          | SumsOfSqs | F     | R <sup>2</sup> | p-value | p-adj. (BH)   |
| all    | unfertilized  | grass bs vs herb bs     | 1                    | 0.188     | 1.119 | 0.051          | 0.2808  | 0.3276        | 1                           | 0.191     | 1.274 | 0.055          | 0.1354  | 0.1458        |
|        |               | grass rs vs herb rs     | 1                    | 0.097     | 0.557 | 0.025          | 0.8925  | 0.8925        | 1                           | 0.306     | 1.919 | 0.080          | 0.0072  | <b>0.0084</b> |
|        |               | grass rp vs herb rp     | 1                    | 0.257     | 1.148 | 0.050          | 0.2693  | 0.3276        | 1                           | 0.274     | 1.654 | 0.070          | 0.021   | <b>0.0235</b> |
|        |               | grass root vs herb root | 1                    | 0.448     | 1.552 | 0.066          | 0.0676  | 0.0996        | 1                           | 0.564     | 3.080 | 0.123          | 0.0001  | <b>0.0001</b> |
|        | N             | grass bs vs herb bs     | 1                    | 0.287     | 1.391 | 0.072          | 0.1375  | 0.1674        | 1                           | 0.404     | 2.038 | 0.088          | 0.0249  | <b>0.0268</b> |
|        |               | grass rs vs herb rs     | 1                    | 0.225     | 1.362 | 0.064          | 0.1519  | 0.1772        | 1                           | 0.523     | 2.915 | 0.139          | 0.0005  | <b>0.0007</b> |
|        |               | grass rp vs herb rp     | 1                    | 0.297     | 1.598 | 0.078          | 0.0292  | <b>0.0481</b> | 1                           | 0.444     | 2.213 | 0.100          | 0.0033  | <b>0.0037</b> |
|        |               | grass root vs herb root | 1                    | 0.512     | 2.491 | 0.106          | 0.0023  | <b>0.0059</b> | 1                           | 0.921     | 5.099 | 0.203          | 0.0001  | <b>0.0002</b> |
|        | NPK           | grass bs vs herb bs     | 1                    | 0.100     | 0.644 | 0.028          | 0.7140  | 0.7289        | 1                           | 0.118     | 0.896 | 0.039          | 0.5637  | 0.5637        |
|        |               | grass rs vs herb rs     | 1                    | 0.244     | 1.459 | 0.062          | 0.1344  | 0.1981        | 1                           | 0.236     | 1.750 | 0.074          | 0.0146  | <b>0.0186</b> |
|        |               | grass rp vs herb rp     | 1                    | 0.301     | 1.528 | 0.068          | 0.0661  | 0.0841        | 1                           | 0.232     | 1.546 | 0.066          | 0.0173  | <b>0.0211</b> |
|        |               | grass root vs herb root | 1                    | 0.288     | 1.188 | 0.056          | 0.2494  | 0.2793        | 1                           | 0.566     | 3.291 | 0.130          | 0.0001  | <b>0.0002</b> |
|        | P             | grass bs vs herb bs     | 1                    | 0.195     | 1.700 | 0.072          | 0.0217  | <b>0.0357</b> | 1                           | 0.273     | 1.888 | 0.079          | 0.0001  | <b>0.0001</b> |
|        |               | grass rs vs herb rs     | 1                    | 0.210     | 1.370 | 0.061          | 0.1068  | 0.1246        | 1                           | 0.260     | 1.810 | 0.079          | 0.0001  | <b>0.0001</b> |
|        |               | grass rp vs herb rp     | 1                    | 0.301     | 1.528 | 0.068          | 0.0661  | 0.0841        | 1                           | 0.295     | 1.857 | 0.081          | 0.0001  | <b>0.0001</b> |
|        |               | grass root vs herb root | 1                    | 0.288     | 1.188 | 0.056          | 0.2494  | 0.2793        | 1                           | 0.829     | 4.514 | 0.170          | 0.0001  | <b>0.0001</b> |

### Supplementary Table 6

Effect of fertilization and plant species on the diazotroph and the general microbial community composition based on PERMANOVA using the Bray-Curtis dissimilarity index. Significant effects are shown in bold.

| Plants | Fertilization | Microenvironment | Factors                 | Diazotroph community |           |                |        |               | General microbial community |           |                |        |               |
|--------|---------------|------------------|-------------------------|----------------------|-----------|----------------|--------|---------------|-----------------------------|-----------|----------------|--------|---------------|
|        |               |                  |                         | Df                   | SumsOfSqs | R <sup>2</sup> | F      | p-value       | Df                          | SumsOfSqs | R <sup>2</sup> | F      | p-value       |
| all    | all           | bulk soil        | Treatment               | 3                    | 8.482     | 0.378          | 17.761 | <b>0.0001</b> | 3                           | 5.757     | 0.284          | 12.602 | <b>0.0001</b> |
|        |               |                  | Plant Species           | 3                    | 0.565     | 0.025          | 1.183  | 0.2268        | 3                           | 0.765     | 0.038          | 1.676  | <b>0.009</b>  |
|        |               |                  | Treatment:Plant Species | 9                    | 1.438     | 0.064          | 1.004  | 0.4455        | 9                           | 1.726     | 0.085          | 1.259  | <b>0.0347</b> |
|        |               |                  | Residuals               | 75                   | 11.939    | 0.532          |        |               | 79                          | 12.030    | 0.593          |        |               |
|        |               |                  | Total                   | 90                   | 22.423    | 1.000          |        |               | 94                          | 20.278    | 1.000          |        |               |
|        |               | rhizosphere soil | Treatment               | 3                    | 6.825     | 0.315          | 13.722 | <b>0.0001</b> | 3                           | 3.497     | 0.199          | 7.705  | <b>0.0001</b> |
|        |               |                  | Plant Species           | 3                    | 0.732     | 0.034          | 1.472  | 0.0602        | 3                           | 0.950     | 0.054          | 2.093  | <b>0.0002</b> |
|        |               |                  | Treatment:Plant Species | 9                    | 1.322     | 0.061          | 0.886  | 0.7567        | 9                           | 1.747     | 0.100          | 1.283  | <b>0.008</b>  |
|        |               |                  | Residuals               | 77                   | 12.767    | 0.590          |        |               | 75                          | 11.347    | 0.647          |        |               |
|        |               |                  | Total                   | 92                   | 21.647    | 1.000          |        |               | 90                          | 17.542    | 1.000          |        |               |
|        |               | rhizoplane       | Treatment               | 3                    | 5.652     | 0.235          | 9.163  | <b>0.0001</b> | 3                           | 3.197     | 0.171          | 6.463  | <b>0.0001</b> |
|        |               |                  | Plant Species           | 3                    | 0.869     | 0.036          | 1.409  | <b>0.0481</b> | 3                           | 1.016     | 0.054          | 2.054  | <b>0.0001</b> |
|        |               |                  | Treatment:Plant Species | 9                    | 1.899     | 0.079          | 1.026  | 0.383         | 9                           | 1.829     | 0.098          | 1.232  | <b>0.0084</b> |
|        |               |                  | Residuals               | 76                   | 15.628    | 0.650          |        |               | 77                          | 12.698    | 0.678          |        |               |
|        |               |                  | Total                   | 91                   | 24.048    | 1.000          |        |               | 92                          | 18.741    | 1.000          |        |               |
|        |               | root             | Treatment               | 3                    | 4.742     | 0.176          | 6.490  | <b>0.0001</b> | 3                           | 2.629     | 0.125          | 5.537  | <b>0.0001</b> |
|        |               |                  | Plant Species           | 3                    | 0.993     | 0.037          | 1.359  | 0.0532        | 3                           | 4.138     | <b>0.197</b>   | 8.716  | <b>0.0001</b> |
|        |               |                  | Treatment:Plant Species | 9                    | 2.515     | 0.093          | 1.147  | 0.1094        | 9                           | 1.865     | 0.089          | 1.309  | <b>0.0036</b> |
|        |               |                  | Residuals               | 77                   | 18.754    | 0.695          |        |               | 78                          | 12.343    | 0.588          |        |               |
|        |               |                  | Total                   | 92                   | 27.003    | 1.000          |        |               | 93                          | 20.974    | 1.000          |        |               |

### Supplementary Table 7

Effect of fertilization and plant species on the diazotroph and the general microbial community composition based on PERMANOVA using the Bray-Curtis dissimilarity index excluding samples from the NPK treatment. Significant effects are shown in bold.

| Plants | Fertilization         | Microenvironment | Factors                 | Diazotroph community |           |                |        |               | General microbial community |           |                |        |               |
|--------|-----------------------|------------------|-------------------------|----------------------|-----------|----------------|--------|---------------|-----------------------------|-----------|----------------|--------|---------------|
|        |                       |                  |                         | Df                   | SumsOfSqs | R <sup>2</sup> | F      | p-value       | Df                          | SumsOfSqs | R <sup>2</sup> | F      | p-value       |
| all    | unfertilized,<br>N, P | bulk soil        | Treatment               | 2                    | 6.618     | 0.388          | 20.700 | <b>0.0001</b> | 2                           | 4.520     | 0.281          | 14.196 | <b>0.0001</b> |
|        |                       |                  | Plant Species           | 3                    | 0.579     | 0.033          | 1.207  | 0.2213        | 3                           | 0.860     | 0.053          | 1.801  | <b>0.0080</b> |
|        |                       |                  | Treatment:Plant Species | 6                    | 1.066     | 0.062          | 1.111  | 0.2769        | 6                           | 1.257     | 0.078          | 1.316  | 0.0522        |
|        |                       |                  | Residuals               | 55                   | 8.791     | 0.515          |        |               | 59                          | 9.394     | 0.585          |        |               |
|        |                       | Total            | 66                      | 17.054               | 1.000     |                |        | 70            | 16.032                      | 1.000     |                |        |               |
|        |                       | rhizosphere soil | Treatment               | 2                    | 5.388     | 0.330          | 16.255 | <b>0.0001</b> | 2                           | 2.641     | 0.195          | 8.348  | <b>0.0001</b> |
|        |                       |                  | Plant Species           | 3                    | 0.582     | 0.035          | 1.170  | 0.2292        | 3                           | 0.920     | 0.068          | 1.940  | <b>0.0005</b> |
|        |                       |                  | Treatment:Plant Species | 6                    | 0.863     | 0.053          | 0.868  | 0.7040        | 6                           | 1.216     | 0.090          | 1.281  | <b>0.0262</b> |
|        |                       |                  | Residuals               | 57                   | 9.447     | 0.580          |        |               | 55                          | 8.700     | 0.647          |        |               |
|        |                       | Total            | 68                      | 16.282               | 1.000     |                |        | 66            | 13.478                      | 1.000     |                |        |               |
|        |                       | rhizoplane       | Treatment               | 2                    | 4.3945    | 0.246          | 10.833 | <b>0.0001</b> | 2                           | 2.375     | 0.165          | 6.933  | <b>0.0001</b> |
|        |                       |                  | Plant Species           | 3                    | 0.7777    | 0.043          | 1.278  | 0.1178        | 3                           | 1.008     | 0.070          | 1.962  | <b>0.0001</b> |
|        |                       |                  | Treatment:Plant Species | 6                    | 1.3129    | 0.073          | 1.079  | 0.2866        | 6                           | 1.229     | 0.085          | 1.195  | <b>0.0540</b> |
|        |                       |                  | Residuals               | 56                   | 11.3575   | 0.636          |        |               | 57                          | 9.766     | 0.679          |        |               |
|        |                       | Total            | 67                      | 17.8426              | 1.000     |                |        | 68            | 14.379                      | 1.000     |                |        |               |
|        |                       | root             | Treatment               | 2                    | 3.3291    | 0.165          | 6.67   | <b>0.0001</b> | 2                           | 1.970     | 0.123          | 6.102  | <b>0.0001</b> |
|        |                       |                  | Plant Species           | 3                    | 0.9141    | 0.045          | 1.22   | 0.1378        | 3                           | 3.584     | <b>0.224</b>   | 7.398  | <b>0.0001</b> |
|        |                       |                  | Treatment:Plant Species | 6                    | 1.6513    | 0.082          | 1.103  | 0.2203        | 6                           | 1.050     | 0.065          | 1.083  | 0.2482        |
|        |                       |                  | Residuals               | 57                   | 14.2113   | 0.706          |        |               | 58                          | 9.365     | 0.586          |        |               |
|        |                       | Total            | 68                      | 20.1058              | 1.000     |                |        | 69            | 15.970                      | 1.000     |                |        |               |

### Supplementary Table 8

Number (n) of investigated samples for (a) *nifH* and 16S rRNA gene sequencing of microenvironments associated with grasses and herbs across fertilization treatments, (b) sequencing expressed *nifH* sequences from cDNA samples of grasses, (c) abundance measurements via quantitative PCR (qPCR), (d) N<sub>2</sub> fixation potential analysis.

(a)

|              | Number (n) of investigated grass samples |             |            |      | Number (n) of investigated herb samples |             |            |      |
|--------------|------------------------------------------|-------------|------------|------|-----------------------------------------|-------------|------------|------|
|              | bulk soil                                | rhizosphere | rhizoplane | root | bulk soil                               | rhizosphere | rhizoplane | root |
| unfertilized | 12                                       | 12          | 12         | 12   | 12                                      | 12          | 12         | 12   |
| N            | 12                                       | 12          | 12         | 12   | 11                                      | 11          | 11         | 11   |
| P            | 12                                       | 12          | 12         | 11   | 12                                      | 12          | 12         | 12   |
| NPK          | 12                                       | 12          | 12         | 12   | 12                                      | 12          | 12         | 12   |

(b)

|              | Number (n) of cDNA samples of investigated grasses |             |            |      |
|--------------|----------------------------------------------------|-------------|------------|------|
|              | bulk soil                                          | rhizosphere | rhizoplane | root |
| unfertilized | 4                                                  | 6           | 6          | 9    |

(c)

|              | Number (n) of investigated grass samples for qPCR |             | Number (n) of investigated herb samples for qPCR |             |
|--------------|---------------------------------------------------|-------------|--------------------------------------------------|-------------|
|              | bulk soil                                         | rhizosphere | bulk soil                                        | rhizosphere |
| unfertilized | 11                                                | 11          | 11                                               | 12          |
| N            | 11                                                | 12          | 11                                               | 11          |
| P            | 11                                                | 11          | 12                                               | 12          |
| NPK          | 11                                                | 12          | 12                                               | 10          |

(d)

|               | Number (n) of investigated samples for N <sub>2</sub> fixation potential analysis |              |   |   |
|---------------|-----------------------------------------------------------------------------------|--------------|---|---|
|               | Incubation days                                                                   | unfertilized | N | P |
| Root exudates | 3                                                                                 | 3            | 3 | 3 |
|               | 7                                                                                 | 3            | 3 | 3 |
|               | 21                                                                                | 3            | 3 | 3 |
| no C addition | 3                                                                                 | 3            | 3 | 3 |
|               | 7                                                                                 | 3            | 3 | 3 |
|               | 21                                                                                | 3            | 3 | 3 |
